# Supplementary material for: Two novel QTLs for harvest index contribute to high yield production in rice (Oryza sativa L.)
Source: Research Square preprint supplement (doi:10.21203/rs.3.rs-56282/v3), 2021-01-22
Supplement: Supplementary file 1 [file b9e584b0b066ba80bbdc45ad.xlsx]

## Sheet: Sheet1
TabIe 4. QTLs identified in this study.
Trait	Chr. 1)		2016ISG_F						2017ISG_F						2018ISG_F						2017TKB
			LOD	Peak position (cM)	QTL range (cM)	Additive effect 2)	PVE (%) 3)		LOD	Peak position (cM)	QTL range (cM)	Additive effect 2)	PVE (%) 3)		LOD	Peak position (cM)	QTL range (cM)	Additive effect 2)	PVE (%) 3)		LOD	Peak position (cM)	QTL range (cM)	Additive effect 2)	PVE (%) 3)
Harvest index (HI)	5		2.42304	36.9	36.2−37.5	0.009	6.94601		5.47514	32.8	22.0−41.4	0.013	15.0129		6.62255	34.4	20.2−44.1	0.015	17.8613		4.66924	50.7	13.7−57.1	0.015	12.9554
	8		4.86927	20.89	10.4−21.3	0.013	13.4692		4.5522	13.81	7.6−21.3	0.012	12.6502		3.57367	13.8	8.5−21.23	0.011	10.0734
Panicle weight (PW)	5								3.1905	23.9	15.6−32.4	0.515	9.04382		2.81925	25.2	19.4−31.5	0.775	8.035
Culm and leaf weight (CW)	5																				3.09674	130.7	125.6−130.7	-1.461	8.79892
	8														3.09687	20.4	11.0−21.3	-0.626	8.79043
Total number of spikelets per panicle (TS)	12														2.50209	2.50209	0−0.4	-3	7.16431
Fertility rate (FR)	5														2.80398	2.80398	66.2−74.3	1.214	7.99328
	8														3.17231	20.89	20.0−21.3	1.239	8.99464
Grain weight (GWt)	5														14.7846	34.7	8.1−50.8	1.248	35.5487
Grain length (GL)	5														9.04034	32.66	20.2−42.0	-0.13	23.5547
	8														2.44265	19.02	18.9−19.1	-0.085	7.00022
	9														2.73651	50.35	47.7−53.1	-0.068	7.80865
Grain width (GWd)	5														36.6583	34.1	0−75.9	0.147	66.3497
	9														3.80939	117.7	105.6−118.2	0.062	10.701
1) "Chr." indicates "chromosome".
2) A positive value for the additive effect indicates that the YTH183 allele increases the trait.
3) "PVE" indicates a percent of the variation explained
